# Supplementary material for: A novel defined cuproptosis-related gene signature for predicting the prognosis of lung adenocarcinoma
Source: Front Genet. 2022 Aug 15;13:975185. doi: 10.3389/fgene.2022.975185 (PMC9421257; doi:10.3389/fgene.2022.975185)
Supplement: Supplementary file 1 [file Table2.xlsx]

## Sheet: enrichGO_output
ONTOLOGY	ID	Description	GeneRatio	BgRatio	pvalue	p.adjust	qvalue	geneID	Count
BP	GO:0003341	cilium movement	38/614	156/18866	8.19725e-23	3.2125e-19	3.00192e-19	202500/51364/387885/27285/83894/83659/1770/164395/80217/139212/378807/246176/348807/64446/338879/27019/57119/257062/1235/118491/154313/54777/200373/56171/255101/93233/92749/79925/89876/150483/26074/338/122664/64518/79740/480/345895/84229	38
BP	GO:0001539	cilium or flagellum-dependent cell motility	27/614	122/18866	1.89515e-15	2.4757e-12	2.31341e-12	202500/27285/83659/164395/1769/80217/139212/378807/246176/338879/27019/57119/257062/1235/54777/56171/255101/92749/79925/80258/150483/338/122664/64518/480/345895/84229	27
BP	GO:0060285	cilium-dependent cell motility	27/614	122/18866	1.89515e-15	2.4757e-12	2.31341e-12	202500/27285/83659/164395/1769/80217/139212/378807/246176/338879/27019/57119/257062/1235/54777/56171/255101/92749/79925/80258/150483/338/122664/64518/480/345895/84229	27
BP	GO:0007018	microtubule-based movement	45/614	368/18866	1.98718e-14	1.94694e-11	1.81932e-11	202500/51364/387885/27285/83894/83659/1770/164395/1769/80217/139212/378807/83657/246176/348807/64446/338879/27019/57119/221458/257062/201625/1235/118491/154313/54777/200373/56171/1768/9928/255101/93233/92749/285643/79925/89876/150483/26074/338/122664/64518/79740/480/345895/84229	45
BP	GO:0060294	cilium movement involved in cell motility	23/614	111/18866	1.02645e-12	8.04533e-10	7.51795e-10	202500/27285/83659/164395/80217/139212/378807/246176/338879/27019/57119/257062/1235/54777/255101/79925/150483/338/122664/64518/480/345895/84229	23
BP	GO:0035082	axoneme assembly	17/614	70/18866	6.55658e-11	4.28254e-08	4.00181e-08	51364/387885/27285/1769/80217/139212/348807/64446/27019/154313/54777/56171/255101/93233/92749/79925/345895	17
BP	GO:0030317	flagellated sperm motility	18/614	96/18866	1.68453e-09	8.25209e-07	7.71115e-07	202500/27285/164395/80217/139212/378807/338879/27019/57119/257062/1235/255101/79925/338/122664/64518/480/84229	18
BP	GO:0097722	sperm motility	18/614	96/18866	1.68453e-09	8.25209e-07	7.71115e-07	202500/27285/164395/80217/139212/378807/338879/27019/57119/257062/1235/255101/79925/338/122664/64518/480/84229	18
BP	GO:0007188	adenylate cyclase-modulating G protein-coupled receptor signaling pathway	28/614	233/18866	2.73789e-09	1.1922e-06	1.11405e-06	64805/153/90226/9283/7432/1812/1269/3360/5744/846/577/1128/1816/1268/148/4986/5737/4161/2740/2913/6344/3973/122042/222487/4158/2835/56246/9340	28
BP	GO:0001578	microtubule bundle formation	18/614	101/18866	3.94952e-09	1.42654e-06	1.33303e-06	51364/387885/27285/1769/80217/139212/246176/348807/64446/27019/154313/54777/56171/255101/93233/92749/79925/345895	18
BP	GO:0070286	axonemal dynein complex assembly	11/614	33/18866	4.00408e-09	1.42654e-06	1.33303e-06	51364/387885/27285/1769/139212/348807/64446/27019/56171/93233/92749	11
BP	GO:0019932	second-messenger-mediated signaling	40/614	456/18866	1.40099e-08	4.57539e-06	4.27547e-06	64805/22953/153/90226/477/3651/7432/1812/1269/844/5744/2695/577/1235/1816/1268/845/148/5737/4161/10846/2740/51083/8600/2044/58529/6344/3973/10900/122042/2903/1524/1908/222487/4158/151651/2835/5024/56246/55273	40
BP	GO:0042391	regulation of membrane potential	39/614	443/18866	1.93393e-08	5.83006e-06	5.4479e-06	64208/3741/22953/4653/2895/153/477/3760/51305/88/1812/859/1269/55584/51738/29119/5348/1128/2890/27345/2900/785/1268/3745/845/148/8913/6323/170572/4915/6332/1142/2903/4916/11280/5024/1135/480/22997	39
BP	GO:0019933	cAMP-mediated signaling	24/614	199/18866	3.48512e-08	9.75584e-06	9.11633e-06	153/90226/7432/1812/1269/5744/2695/577/1816/1268/148/5737/4161/10846/2740/51083/2044/6344/3973/122042/222487/4158/2835/56246	24
BP	GO:0007187	G protein-coupled receptor signaling pathway, coupled to cyclic nucleotide second messenger	28/614	263/18866	3.97603e-08	1.0388e-05	9.70709e-06	64805/153/90226/9283/7432/1812/1269/3360/5744/846/577/1128/1816/1268/148/4986/5737/4161/2740/2913/6344/3973/122042/222487/4158/2835/56246/9340	28
BP	GO:0035637	multicellular organismal signaling	24/614	206/18866	6.79468e-08	1.66427e-05	1.55518e-05	3741/786/477/53828/3760/1812/844/51738/29119/5348/1816/27345/785/51086/845/8913/492/6323/4915/6332/4916/11280/5024/480	24
BP	GO:0019935	cyclic-nucleotide-mediated signaling	25/614	224/18866	8.48471e-08	1.95597e-05	1.82776e-05	153/90226/7432/1812/1269/5744/2695/577/1816/1268/148/5737/4161/10846/2740/51083/2044/6344/3973/10900/122042/222487/4158/2835/56246	25
BP	GO:0007189	adenylate cyclase-activating G protein-coupled receptor signaling pathway	19/614	147/18866	3.13702e-07	6.82998e-05	6.38227e-05	153/90226/7432/1812/1269/5744/577/1816/1268/148/5737/4161/2740/3973/122042/222487/4158/2835/56246	19
BP	GO:0001508	action potential	18/614	138/18866	5.58074e-07	0.00011511	0.000107564	3741/477/3760/1812/859/1269/29119/27345/1268/3745/148/8913/6323/4915/6332/4916/11280/5024	18
BP	GO:0007215	glutamate receptor signaling pathway	15/614	101/18866	9.18204e-07	0.000179922	0.000168128	2895/4308/88/23025/54550/2890/388336/5923/2900/3745/1393/2913/57554/2903/146395	15
BP	GO:0036159	inner dynein arm assembly	6/614	15/18866	4.51606e-06	0.000793148	0.000741156	51364/387885/27285/139212/348807/56171	6
BP	GO:0006813	potassium ion transport	23/614	242/18866	4.57586e-06	0.000793148	0.000741156	64805/3741/477/53828/284525/3760/51305/7432/88/1812/859/3744/5348/27345/3745/845/3754/51083/440699/1908/1804/480/3739	23
BP	GO:0055074	calcium ion homeostasis	35/614	468/18866	4.65486e-06	0.000793148	0.000741156	825/3741/22953/477/2864/79608/4308/196541/1812/859/844/55584/51738/846/2856/1235/2890/84239/1816/3061/1268/845/55503/148/5737/3558/2740/492/8600/2903/1524/1908/2835/6358/5024	35
BP	GO:0050804	modulation of chemical synaptic transmission	34/614	454/18866	6.1776e-06	0.00100875	0.000942626	2895/440279/477/347730/1812/5865/1269/6900/2695/9515/51738/23025/2890/388336/1816/5923/27345/2900/1268/3745/148/2913/4915/766/6344/22829/1142/2903/1524/1000/6532/5024/22997/7425	34
BP	GO:0099177	regulation of trans-synaptic signaling	34/614	455/18866	6.47572e-06	0.00101513	0.000948591	2895/440279/477/347730/1812/5865/1269/6900/2695/9515/51738/23025/2890/388336/1816/5923/27345/2900/1268/3745/148/2913/4915/766/6344/22829/1142/2903/1524/1000/6532/5024/22997/7425	34
BP	GO:0006874	cellular calcium ion homeostasis	34/614	456/18866	6.78703e-06	0.00102301	0.000955954	825/3741/22953/477/2864/79608/4308/196541/1812/859/844/55584/51738/846/2856/1235/2890/84239/1816/3061/1268/845/55503/148/5737/3558/2740/492/2903/1524/1908/2835/6358/5024	34
BP	GO:1903522	regulation of blood circulation	26/614	303/18866	7.27458e-06	0.00105589	0.000986678	3741/786/153/477/53828/3760/2244/859/844/51738/846/29119/5348/27345/785/51086/845/2243/148/3558/8913/2740/492/4634/1908/480	26
BP	GO:1901748	leukotriene D4 metabolic process	5/614	10/18866	7.90394e-06	0.00106812	0.000998106	2679/728226/91227/92086/728441	5
BP	GO:1901750	leukotriene D4 biosynthetic process	5/614	10/18866	7.90394e-06	0.00106812	0.000998106	2679/728226/91227/92086/728441	5
BP	GO:0034765	regulation of ion transmembrane transport	35/614	489/18866	1.20643e-05	0.001576	0.00147269	825/3741/786/477/53828/3760/378807/196541/88/1812/859/844/3744/5348/2890/388336/5923/785/3745/1393/845/342667/8913/3754/51083/6323/6332/57554/440699/2903/1908/146395/11280/1804/3739	35
BP	GO:0072503	cellular divalent inorganic cation homeostasis	35/614	492/18866	1.37426e-05	0.00172707	0.00161386	825/3741/22953/477/2864/79608/4308/196541/1812/859/844/55584/51738/846/2856/1235/2890/84239/1816/3061/1268/845/55503/148/5737/3558/2740/492/7780/2903/1524/1908/2835/6358/5024	35
BP	GO:0006751	glutathione catabolic process	5/614	11/18866	1.41021e-05	0.00172707	0.00161386	2679/728226/91227/92086/728441	5
BP	GO:0051480	regulation of cytosolic calcium ion concentration	28/614	357/18866	1.76099e-05	0.00209131	0.00195423	825/3741/22953/477/2864/79608/4308/196541/1812/859/844/55584/51738/2856/1235/2890/3061/1268/845/55503/148/5737/3558/2740/492/2903/1524/5024	28
BP	GO:0019226	transmission of nerve impulse	11/614	72/18866	1.97673e-05	0.00227848	0.00212912	1812/51738/1816/27345/8913/6323/4915/6332/4916/11280/5024	11
BP	GO:0036158	outer dynein arm assembly	6/614	19/18866	2.19004e-05	0.00245221	0.00229147	51364/1769/139212/64446/27019/93233	6
BP	GO:0060047	heart contraction	24/614	287/18866	2.48069e-05	0.0027005	0.00252348	3741/786/153/6445/477/53828/3760/859/844/29119/5348/785/51086/845/7273/148/3558/8913/2740/492/6323/4634/1908/480	24
BP	GO:0003012	muscle system process	33/614	467/18866	2.75996e-05	0.00292332	0.00273169	3741/22953/4653/2660/477/3760/4620/88/1812/859/844/51738/29119/5348/140628/221476/51086/845/342667/7273/148/389827/8913/93649/6323/407042/58529/84676/6332/4634/1908/5024/4606	33
BP	GO:0071805	potassium ion transmembrane transport	20/614	218/18866	3.15835e-05	0.00325725	0.00304374	64805/3741/477/53828/284525/3760/51305/88/859/3744/27345/3745/845/3754/51083/440699/1908/1804/480/3739	20
BP	GO:0007200	phospholipase C-activating G protein-coupled receptor signaling pathway	13/614	104/18866	3.27694e-05	0.00329291	0.00307705	64805/4829/7432/88/1812/846/2856/1128/1816/148/4986/3973/1524	13
BP	GO:1900449	regulation of glutamate receptor signaling pathway	10/614	64/18866	3.84885e-05	0.00377092	0.00352373	88/23025/54550/2890/388336/5923/1393/57554/2903/146395	10
BP	GO:0019233	sensory perception of pain	13/614	106/18866	4.01724e-05	0.00383989	0.00358818	7432/1269/2695/1268/3231/4986/6323/2903/5179/3218/11280/5024/55273	13
BP	GO:0019370	leukotriene biosynthetic process	6/614	21/18866	4.14316e-05	0.00386596	0.00361254	2679/728226/91227/4056/92086/728441	6
BP	GO:0003015	heart process	24/614	297/18866	4.31143e-05	0.00392941	0.00367184	3741/786/153/6445/477/53828/3760/859/844/29119/5348/785/51086/845/7273/148/3558/8913/2740/492/6323/4634/1908/480	24
BP	GO:0048167	regulation of synaptic plasticity	18/614	191/18866	5.46644e-05	0.00486886	0.0045497	2895/440279/347730/1812/6900/2695/23025/2890/388336/1816/5923/3745/4915/6344/2903/1524/5024/7425	18
BP	GO:0019228	neuronal action potential	7/614	34/18866	9.34731e-05	0.00814047	0.00760685	1812/27345/8913/6323/6332/11280/5024	7
BP	GO:0008016	regulation of heart contraction	21/614	256/18866	0.000103285	0.00879939	0.00822258	3741/786/153/477/53828/3760/859/844/29119/5348/785/51086/845/148/3558/8913/2740/492/4634/1908/480	21
BP	GO:0006691	leukotriene metabolic process	7/614	35/18866	0.00011359	0.00931429	0.00870373	2679/728226/91227/4056/92086/728441/1579	7
BP	GO:0044782	cilium organization	28/614	397/18866	0.000114082	0.00931429	0.00870373	51364/387885/27285/83894/83659/1769/80217/139212/83657/348807/64446/100507003/27019/118491/154313/54777/200373/56171/154865/255101/93233/92749/146845/79925/150483/26074/64518/345895	28
BP	GO:0007156	homophilic cell adhesion via plasma membrane adhesion molecules	16/614	168/18866	0.00012358	0.00988387	0.00923597	27328/120114/11122/65217/27255/6900/28316/29930/64881/56142/6092/64405/1000/147409/22997/389118	16
BP	GO:0006936	muscle contraction	26/614	362/18866	0.000148568	0.0114932	0.0107398	3741/22953/477/3760/4620/88/1812/859/844/51738/29119/5348/51086/845/342667/7273/148/8913/93649/6323/84676/6332/4634/1908/5024/4606	26
BP	GO:0007204	positive regulation of cytosolic calcium ion concentration	24/614	322/18866	0.000151646	0.0114932	0.0107398	825/22953/477/2864/79608/4308/196541/1812/859/844/55584/51738/2856/1235/1268/845/55503/148/5737/3558/2740/2903/1524/5024	24
BP	GO:0035902	response to immobilization stress	6/614	26/18866	0.000153015	0.0114932	0.0107398	1544/190/7031/5972/51083/5309	6
BP	GO:0061351	neural precursor cell proliferation	15/614	154/18866	0.000155432	0.0114932	0.0107398	131405/63950/2637/9283/10642/407738/1638/64399/9928/6469/1524/1000/6532/5454/5309	15
BP	GO:0070252	actin-mediated cell contraction	13/614	123/18866	0.000187408	0.013601	0.0127094	3741/477/3760/4620/88/7429/859/29119/7273/8913/6323/4634/4606	13
BP	GO:0042310	vasoconstriction	10/614	78/18866	0.000212679	0.0151544	0.014161	3741/477/2244/846/1816/27345/2243/148/1908/6532	10
BP	GO:0035296	regulation of tube diameter	14/614	143/18866	0.00024192	0.016633	0.0155427	3741/153/477/2244/7432/1812/846/1816/27345/1373/2243/148/1908/6532	14
BP	GO:0097746	regulation of blood vessel diameter	14/614	143/18866	0.00024192	0.016633	0.0155427	3741/153/477/2244/7432/1812/846/1816/27345/1373/2243/148/1908/6532	14
BP	GO:0010959	regulation of metal ion transport	27/614	396/18866	0.000259455	0.0172796	0.0161469	825/64805/3741/22953/786/477/53828/2864/7432/196541/88/1812/859/844/846/57119/5348/79570/785/845/342667/51083/440699/1908/151651/5024/1804	27
BP	GO:0035150	regulation of tube size	14/614	144/18866	0.000260141	0.0172796	0.0161469	3741/153/477/2244/7432/1812/846/1816/27345/1373/2243/148/1908/6532	14
BP	GO:0060271	cilium assembly	26/614	377/18866	0.000281171	0.0183651	0.0171613	51364/387885/27285/83659/1769/80217/139212/83657/348807/64446/100507003/27019/118491/154313/54777/200373/56171/154865/255101/93233/92749/146845/79925/150483/64518/345895	26
BP	GO:0030072	peptide hormone secretion	20/614	257/18866	0.000301354	0.0193607	0.0180916	3741/2244/2864/3651/7432/5798/2695/9515/51738/846/1268/3745/1393/2243/2740/51083/8600/2044/1908/7425	20
BP	GO:0061337	cardiac conduction	14/614	148/18866	0.000345308	0.0214912	0.0200824	3741/786/477/53828/3760/844/29119/5348/785/51086/845/8913/492/480	14
BP	GO:0007611	learning or memory	20/614	260/18866	0.000350406	0.0214912	0.0200824	4593/477/7432/1812/6900/2695/577/2890/1816/5923/1268/1393/2740/1620/4915/139411/22829/2903/1524/6532	20
BP	GO:0007416	synapse assembly	16/614	184/18866	0.000350966	0.0214912	0.0200824	4593/2895/2823/92737/347730/1812/51738/577/2066/375323/4915/6092/22829/4916/54674/1000	16
BP	GO:0006814	sodium ion transport	19/614	241/18866	0.00035957	0.0216793	0.0202582	477/53828/284525/159963/378807/859/6554/5348/79570/6540/6568/388662/8913/6323/6332/6532/11280/200010/480	19
BP	GO:0050890	cognition	22/614	302/18866	0.000386697	0.0229616	0.0214564	4593/477/7432/1812/6900/2695/577/1128/2890/1816/5923/1268/1393/2740/1620/4915/139411/3973/22829/2903/1524/6532	22
BP	GO:0009914	hormone transport	23/614	323/18866	0.000397147	0.0232302	0.0217074	3741/2244/2864/114571/3651/7432/3623/5798/2695/9515/51738/846/5972/1268/3745/1393/2243/2740/51083/8600/2044/1908/7425	23
BP	GO:0044273	sulfur compound catabolic process	8/614	56/18866	0.000430539	0.024813	0.0231864	2679/728226/91227/92086/728441/339896/63827/4969	8
BP	GO:0014821	phasic smooth muscle contraction	5/614	21/18866	0.000473911	0.026563	0.0248217	22953/1812/51738/1908/5024	5
BP	GO:0097756	negative regulation of blood vessel diameter	10/614	86/18866	0.00047446	0.026563	0.0248217	3741/477/2244/846/1816/27345/2243/148/1908/6532	10
BP	GO:1904062	regulation of cation transmembrane transport	24/614	349/18866	0.000495871	0.0273707	0.0255765	825/786/477/53828/196541/88/1812/859/844/5348/2890/388336/5923/785/1393/845/342667/51083/57554/440699/2903/1908/146395/1804	24
BP	GO:0045214	sarcomere organization	7/614	45/18866	0.000578533	0.0314899	0.0294257	825/88/859/844/845/7273/58529	7
BP	GO:0003352	regulation of cilium movement	6/614	33/18866	0.000606619	0.0325663	0.0304315	246176/338879/57119/1235/92749/122664	6
BP	GO:0046879	hormone secretion	22/614	314/18866	0.000654318	0.0346523	0.0323808	3741/2244/2864/3651/7432/3623/5798/2695/9515/51738/846/5972/1268/3745/1393/2243/2740/51083/8600/2044/1908/7425	22
BP	GO:0019229	regulation of vasoconstriction	8/614	60/18866	0.000692093	0.0361642	0.0337936	3741/477/2244/846/27345/2243/148/1908	8
BP	GO:2000177	regulation of neural precursor cell proliferation	10/614	91/18866	0.000745048	0.038419	0.0359006	131405/63950/9283/407738/1638/6469/1524/1000/6532/5309	10
BP	GO:0007286	spermatid development	14/614	160/18866	0.000757232	0.0385401	0.0360138	80217/378807/91181/135138/257062/1235/5047/255101/146849/341567/6691/79925/9576/11055	14
BP	GO:0098742	cell-cell adhesion via plasma-membrane adhesion molecules	20/614	277/18866	0.000781994	0.0392902	0.0367147	27328/120114/2895/11122/1088/65217/27255/6900/28316/140628/29930/64881/56142/6092/10686/64405/1000/147409/22997/389118	20
BP	GO:0070838	divalent metal ion transport	29/614	471/18866	0.000822527	0.0408036	0.0381289	825/64805/22953/786/477/2823/2864/4308/378807/196541/1812/859/844/55584/846/57119/785/845/55503/342667/148/8913/492/7780/10686/2903/151651/5024/348938	29
BP	GO:0060078	regulation of postsynaptic membrane potential	13/614	144/18866	0.000864102	0.0423302	0.0395554	22953/2895/153/55584/51738/1128/2890/2900/1142/2903/5024/1135/22997	13
BP	GO:0060295	regulation of cilium movement involved in cell motility	5/614	24/18866	0.000913113	0.0436401	0.0407795	246176/338879/57119/1235/122664	5
BP	GO:1902019	regulation of cilium-dependent cell motility	5/614	24/18866	0.000913113	0.0436401	0.0407795	246176/338879/57119/1235/122664	5
BP	GO:2000310	regulation of NMDA receptor activity	6/614	36/18866	0.000982184	0.0463757	0.0433357	88/2890/5923/1393/57554/2903	6
BP	GO:0050808	synapse organization	27/614	433/18866	0.00101968	0.0475729	0.0444544	4593/22953/2895/440279/2823/92737/347730/1812/6900/51738/577/23025/1821/388336/785/2066/375323/4915/6092/63827/22829/4916/1524/54674/1000/9758/22997	27
BP	GO:0072511	divalent inorganic cation transport	29/614	478/18866	0.00103368	0.0476589	0.0445348	825/64805/22953/786/477/2823/2864/4308/378807/196541/1812/859/844/55584/846/57119/785/845/55503/342667/148/8913/492/7780/10686/2903/151651/5024/348938	29
BP	GO:0051592	response to calcium ion	13/614	147/18866	0.00104649	0.0476884	0.0445623	825/2244/9362/846/27345/1393/845/55503/2243/7273/5179/151835/2978	13
BP	GO:0048515	spermatid differentiation	14/614	166/18866	0.0010852	0.0488841	0.0456797	80217/378807/91181/135138/257062/1235/5047/255101/146849/341567/6691/79925/9576/11055	14
BP	GO:0021924	cell proliferation in external granule layer	4/614	15/18866	0.00113877	0.0496611	0.0464058	2637/9283/6469/6532	4
BP	GO:0021930	cerebellar granule cell precursor proliferation	4/614	15/18866	0.00113877	0.0496611	0.0464058	2637/9283/6469/6532	4
BP	GO:0086010	membrane depolarization during action potential	6/614	37/18866	0.00114047	0.0496611	0.0464058	477/859/8913/6323/6332/11280	6
CC	GO:0031514	motile cilium	36/664	199/19559	1.48563e-16	6.20995e-14	5.12934e-14	202500/387885/27285/83894/83659/1770/1769/80217/378807/257044/348807/64446/135138/283726/257062/219621/1235/118491/154313/154865/343521/255101/92749/146845/130540/79925/89876/150483/26074/122664/64518/9576/79740/480/345895/84229	36
CC	GO:0005930	axoneme	23/664	122/19559	1.93366e-11	3.81709e-09	3.15287e-09	387885/1770/1769/80217/348807/64446/283726/27019/118491/154313/54777/200373/56171/343521/93233/92749/158798/132851/89876/80258/26074/9576/345895	23
CC	GO:0097014	ciliary plasm	23/664	124/19559	2.73954e-11	3.81709e-09	3.15287e-09	387885/1770/1769/80217/348807/64446/283726/27019/118491/154313/54777/200373/56171/343521/93233/92749/158798/132851/89876/80258/26074/9576/345895	23
CC	GO:0097729	9+2 motile cilium	22/664	120/19559	9.39055e-11	9.81312e-09	8.10552e-09	202500/83894/1770/1769/378807/257044/64446/135138/283726/257062/219621/1235/118491/343521/255101/130540/79925/150483/122664/64518/9576/480	22
CC	GO:0036126	sperm flagellum	21/664	115/19559	2.7104e-10	2.2659e-08	1.8716e-08	202500/83894/1769/378807/257044/64446/135138/283726/257062/219621/1235/118491/343521/255101/130540/79925/150483/122664/64518/9576/480	21
CC	GO:1902495	transmembrane transporter complex	33/664	322/19559	1.78692e-08	1.24489e-06	1.02826e-06	3741/786/2895/477/53828/3760/378807/257044/55584/3744/257062/5348/144453/2890/388336/27345/2900/785/3745/845/8913/3754/6323/6332/57554/1142/440699/2903/11280/1135/1804/480/3739	33
CC	GO:1990351	transporter complex	33/664	330/19559	3.24515e-08	1.93782e-06	1.60062e-06	3741/786/2895/477/53828/3760/378807/257044/55584/3744/257062/5348/144453/2890/388336/27345/2900/785/3745/845/8913/3754/6323/6332/57554/1142/440699/2903/11280/1135/1804/480/3739	33
CC	GO:0099240	intrinsic component of synaptic membrane	22/664	166/19559	4.96183e-08	2.59256e-06	2.14142e-06	2895/2823/3760/347730/27255/1812/6900/55584/1128/2890/388336/2900/1268/148/2066/2913/2903/4916/1000/146395/6532/5024	22
CC	GO:0005858	axonemal dynein complex	8/664	20/19559	1.48451e-07	6.8947e-06	5.69494e-06	1770/1769/64446/27019/118491/56171/93233/92749	8
CC	GO:0099699	integral component of synaptic membrane	20/664	154/19559	2.80453e-07	1.17229e-05	9.68302e-06	2895/2823/3760/347730/1812/55584/1128/2890/388336/2900/1268/148/2066/2913/2903/4916/1000/146395/6532/5024	20
CC	GO:0034702	ion channel complex	29/664	299/19559	4.215e-07	1.6017e-05	1.32299e-05	3741/786/2895/3760/378807/257044/55584/3744/257062/144453/2890/388336/27345/2900/785/3745/845/8913/3754/6323/6332/57554/1142/440699/2903/11280/1135/1804/3739	29
CC	GO:0036157	outer dynein arm	6/664	11/19559	5.97838e-07	2.08247e-05	1.7201e-05	1770/1769/64446/27019/118491/93233	6
CC	GO:0098936	intrinsic component of postsynaptic membrane	17/664	122/19559	7.99874e-07	2.5719e-05	2.12436e-05	2895/347730/1812/6900/55584/1128/2890/388336/2900/148/2066/2913/2903/4916/1000/146395/6532	17
CC	GO:0032838	plasma membrane bounded cell projection cytoplasm	23/664	211/19559	8.88762e-07	2.65359e-05	2.19183e-05	387885/1770/1769/80217/348807/64446/283726/27019/118491/154313/54777/200373/56171/343521/93233/92749/158798/132851/89876/80258/26074/9576/345895	23
CC	GO:0030286	dynein complex	11/664	53/19559	1.32167e-06	3.68305e-05	3.04216e-05	1770/1769/83657/64446/27019/201625/118491/56171/1768/93233/92749	11
CC	GO:0034703	cation channel complex	23/664	221/19559	1.98877e-06	4.94618e-05	4.08549e-05	3741/786/3760/378807/257044/3744/257062/2890/388336/27345/2900/785/3745/845/8913/3754/6323/6332/440699/2903/11280/1804/3739	23
CC	GO:0099568	cytoplasmic region	25/664	254/19559	2.01161e-06	4.94618e-05	4.08549e-05	387885/440279/1770/1769/80217/348807/64446/283726/27019/23025/118491/154313/54777/200373/56171/343521/93233/92749/158798/132851/89876/80258/26074/9576/345895	25
CC	GO:0099055	integral component of postsynaptic membrane	16/664	117/19559	2.16447e-06	5.02639e-05	4.15174e-05	2895/347730/1812/55584/1128/2890/388336/2900/148/2066/2913/2903/4916/1000/146395/6532	16
CC	GO:0097060	synaptic membrane	32/664	387/19559	3.5971e-06	7.91361e-05	6.53655e-05	4593/2895/440279/2823/3760/347730/27255/88/1812/6900/55584/23025/1128/2890/388336/2900/1268/3745/148/2066/375323/2913/22829/1142/2903/4916/1000/146395/6532/5024/1135/22997	32
CC	GO:0098889	intrinsic component of presynaptic membrane	13/664	83/19559	4.20587e-06	8.79027e-05	7.26066e-05	2823/3760/27255/1812/1128/2900/1268/148/2066/2913/1000/6532/5024	13
CC	GO:0099056	integral component of presynaptic membrane	12/664	74/19559	6.78068e-06	0.000134968	0.000111482	2823/3760/1812/1128/2900/1268/148/2066/2913/1000/6532/5024	12
CC	GO:0045211	postsynaptic membrane	25/664	280/19559	1.1301e-05	0.00021472	0.000177356	4593/2895/347730/88/1812/6900/55584/1128/2890/388336/2900/3745/148/2066/375323/2913/22829/1142/2903/4916/1000/146395/6532/1135/22997	25
CC	GO:0042383	sarcolemma	15/664	135/19559	5.55864e-05	0.00101022	0.000834432	825/64208/786/6445/477/3760/859/844/5348/3745/342667/148/6323/28965/1000	15
CC	GO:0030315	T-tubule	9/664	54/19559	7.68796e-05	0.00133899	0.00110599	825/786/477/3760/859/844/5348/148/6323	9
CC	GO:0042734	presynaptic membrane	16/664	156/19559	8.39734e-05	0.00140404	0.00115972	440279/2823/3760/27255/1812/23025/1128/2900/1268/148/2066/2913/2903/1000/6532/5024	16
CC	GO:0099060	integral component of postsynaptic specialization membrane	10/664	74/19559	0.000192395	0.00309312	0.00255488	2895/347730/55584/1128/2890/388336/2066/2903/1000/146395	10
CC	GO:0098948	intrinsic component of postsynaptic specialization membrane	10/664	77/19559	0.000268208	0.00415225	0.00342971	2895/347730/55584/1128/2890/388336/2066/2903/1000/146395	10
CC	GO:0060076	excitatory synapse	8/664	52/19559	0.000339924	0.00507457	0.00419154	2895/440279/3760/347730/27255/2890/388336/22829	8
CC	GO:0005890	sodium:potassium-exchanging ATPase complex	4/664	12/19559	0.000524051	0.00755356	0.00623915	477/53828/5348/480	4
CC	GO:0098978	glutamatergic synapse	25/664	361/19559	0.000639502	0.00891039	0.00735988	2895/2823/347730/88/1812/51738/23025/1128/1821/2890/388336/1268/148/388662/2066/492/2913/5602/63827/22829/2903/4916/84435/146395/9758	25
CC	GO:0099634	postsynaptic specialization membrane	12/664	118/19559	0.00067999	0.00916889	0.0075734	2895/347730/88/55584/1128/2890/388336/2066/22829/2903/1000/146395	12
CC	GO:0098982	GABA-ergic synapse	9/664	74/19559	0.000875371	0.0114345	0.0094448	347730/1812/1268/148/388662/2066/492/22829/22997	9
CC	GO:0005875	microtubule associated complex	14/664	159/19559	0.00107016	0.0135554	0.0111966	1770/1769/83657/64446/27019/221458/201625/118491/56171/1768/81569/9928/93233/92749	14
CC	GO:0097228	sperm principal piece	5/664	25/19559	0.00134159	0.0164936	0.0136235	378807/257044/257062/1235/9576	5
CC	GO:0062023	collagen-containing extracellular matrix	27/664	427/19559	0.00154067	0.017311	0.0142987	10216/2255/1310/80070/4653/7044/2267/2244/81578/6278/7060/10218/253935/1215/51378/2243/5858/12/3617/1302/23671/6469/1000/11095/256076/4969/256158	27
CC	GO:0034705	potassium channel complex	10/664	96/19559	0.00155224	0.017311	0.0142987	3741/3760/3744/27345/2900/3745/3754/440699/1804/3739	10
CC	GO:0014704	intercalated disc	7/664	51/19559	0.00159102	0.017311	0.0142987	3741/477/859/29119/5348/6323/1000	7
CC	GO:0099061	integral component of postsynaptic density membrane	7/664	51/19559	0.00159102	0.017311	0.0142987	2895/1128/2890/388336/2066/2903/146395	7
CC	GO:0034706	sodium channel complex	5/664	26/19559	0.00161514	0.017311	0.0142987	2900/8913/6323/6332/11280	5
CC	GO:0098688	parallel fiber to Purkinje cell synapse	4/664	16/19559	0.00172908	0.0179436	0.0148212	2895/440279/3760/27255	4
CC	GO:0005874	microtubule	27/664	431/19559	0.00176002	0.0179436	0.0148212	27285/83659/1770/165186/164395/1769/80086/83657/246176/64446/283726/27019/221458/201625/154313/1393/56171/149069/1768/6344/9928/84676/285643/80258/122664/65055/9576	27
CC	GO:0001518	voltage-gated sodium channel complex	4/664	17/19559	0.00220089	0.0216766	0.0179046	8913/6323/6332/11280	4
CC	GO:0099146	intrinsic component of postsynaptic density membrane	7/664	54/19559	0.00222989	0.0216766	0.0179046	2895/1128/2890/388336/2066/2903/146395	7
CC	GO:0043197	dendritic spine	14/664	175/19559	0.00264455	0.0249063	0.0205723	2895/477/2823/10642/88/1812/2890/2913/56899/4915/2903/5024/9758/3739	14
CC	GO:0097225	sperm midpiece	5/664	29/19559	0.0026813	0.0249063	0.0205723	135138/1235/255101/79925/480	5
CC	GO:0090533	cation-transporting ATPase complex	4/664	18/19559	0.00275446	0.0250297	0.0206742	477/53828/5348/480	4
CC	GO:0044309	neuron spine	14/664	177/19559	0.00293378	0.0254041	0.0209835	2895/477/2823/10642/88/1812/2890/2913/56899/4915/2903/5024/9758/3739	14
CC	GO:0031674	I band	12/664	140/19559	0.00296645	0.0254041	0.0209835	825/3741/88/859/844/845/7273/148/6323/58529/84676/4634	12
CC	GO:0008076	voltage-gated potassium channel complex	9/664	88/19559	0.00297799	0.0254041	0.0209835	3741/3760/3744/27345/3745/3754/440699/1804/3739	9
CC	GO:0005891	voltage-gated calcium channel complex	6/664	43/19559	0.00312957	0.0261632	0.0216105	786/378807/257044/257062/785/8913	6
CC	GO:0098984	neuron to neuron synapse	23/664	368/19559	0.00383099	0.0313991	0.0259353	2895/88/1128/1821/2890/388336/2900/400745/2066/2913/56899/4915/57554/22829/2903/5179/1000/84435/146395/5024/6247/9758/22997	23
CC	GO:0036128	CatSper complex	3/664	10/19559	0.00390925	0.0314243	0.0259561	378807/257044/257062	3
CC	GO:0098839	postsynaptic density membrane	9/664	92/19559	0.00401974	0.0317028	0.0261862	2895/88/1128/2890/388336/2066/22829/2903/146395	9
CC	GO:0030018	Z disc	11/664	128/19559	0.00426796	0.0330372	0.0272883	825/3741/88/859/844/845/7273/148/6323/58529/84676	11
CC	GO:0030017	sarcomere	15/664	207/19559	0.00484018	0.0367854	0.0303843	825/3741/4620/88/859/844/137735/845/7273/148/6323/58529/84676/4634/343263	15
CC	GO:0002177	manchette	3/664	11/19559	0.0052406	0.0391173	0.0323104	84688/286187/79925	3
CC	GO:0008328	ionotropic glutamate receptor complex	6/664	49/19559	0.00604982	0.0443654	0.0366453	2895/2890/388336/2900/57554/2903	6
CC	GO:0032280	symmetric synapse	3/664	12/19559	0.00681278	0.049099	0.0405552	22829/5179/22997	3
CC	GO:0043204	perikaryon	12/664	156/19559	0.00703503	0.0498414	0.0411684	7432/5798/1269/9362/1821/3745/1393/10846/5602/5179/345193/55273	12
MF	GO:0046873	metal ion transmembrane transporter activity	37/629	428/18352	2.58913e-07	0.000180204	0.000164342	3741/786/477/53828/2823/284525/3760/159963/4308/51305/378807/6554/55584/3744/6540/27345/2900/785/1268/3745/55503/6568/8913/3754/492/7780/6323/10686/6332/440699/2903/6532/11280/200010/348938/480/3739	37
MF	GO:0005261	cation channel activity	31/629	334/18352	5.363e-07	0.000186633	0.000170205	3741/22953/786/53828/2823/3760/4308/51305/378807/55584/3744/2890/27345/2900/785/1268/3745/55503/8913/3754/6323/170572/6332/1142/440699/2903/1259/11280/5024/1135/3739	31
MF	GO:0015267	channel activity	37/629	479/18352	3.84017e-06	0.000701035	0.000639329	6563/3741/22953/786/2895/53828/2823/3760/4308/51305/378807/55584/3744/5348/144453/2890/27345/2900/785/1268/3745/55503/8913/3754/6323/170572/81025/89872/6332/1142/440699/2903/1259/11280/5024/1135/3739	37
MF	GO:0022803	passive transmembrane transporter activity	37/629	480/18352	4.02894e-06	0.000701035	0.000639329	6563/3741/22953/786/2895/53828/2823/3760/4308/51305/378807/55584/3744/5348/144453/2890/27345/2900/785/1268/3745/55503/8913/3754/6323/170572/81025/89872/6332/1142/440699/2903/1259/11280/5024/1135/3739	37
MF	GO:0005216	ion channel activity	34/629	431/18352	6.04888e-06	0.000842005	0.00076789	3741/22953/786/2895/53828/2823/3760/4308/51305/378807/55584/3744/5348/144453/2890/27345/2900/785/1268/3745/55503/8913/3754/6323/170572/6332/1142/440699/2903/1259/11280/5024/1135/3739	34
MF	GO:0008528	G protein-coupled peptide receptor activity	17/629	148/18352	1.30932e-05	0.00151881	0.00138512	4829/9283/64106/1235/3061/4986/4161/2740/51083/4888/6344/3973/122042/1524/4158/114815/9340	17
MF	GO:0022836	gated channel activity	28/629	337/18352	1.55513e-05	0.00154625	0.00141014	3741/22953/786/2895/3760/51305/378807/55584/3744/2890/27345/2900/785/1268/3745/8913/3754/6323/170572/6332/1142/440699/2903/1259/11280/5024/1135/3739	28
MF	GO:0001653	peptide receptor activity	17/629	152/18352	1.86295e-05	0.00162077	0.00147811	4829/9283/64106/1235/3061/4986/4161/2740/51083/4888/6344/3973/122042/1524/4158/114815/9340	17
MF	GO:0098960	postsynaptic neurotransmitter receptor activity	10/629	65/18352	6.80671e-05	0.00525751	0.00479474	2895/153/1812/55584/1128/2890/1816/2900/1142/1135	10
MF	GO:0005179	hormone activity	14/629	122/18352	7.5539e-05	0.00525751	0.00479474	90226/1081/7432/3623/5744/2695/51738/84666/51083/3641/5179/1908/344901/7425	14
MF	GO:0030594	neurotransmitter receptor activity	13/629	111/18352	0.000109732	0.00694305	0.00633191	2895/153/1812/3360/55584/1128/2890/1816/2900/170572/1142/2903/1135	13
MF	GO:0004867	serine-type endopeptidase inhibitor activity	12/629	98/18352	0.000130375	0.00756174	0.00689614	6318/643394/5268/57119/5858/5273/12/6691/27151/84651/5276/3053	12
MF	GO:0030546	signaling receptor activator activity	33/629	492/18352	0.000199291	0.0103028	0.00939597	2255/2660/7044/90226/1081/7432/407738/3623/5744/7060/2695/27189/51738/7031/6360/84666/51378/116173/3558/51083/3641/8200/2277/8600/151449/6469/5179/1908/8190/344901/6358/4969/7425	33
MF	GO:0005230	extracellular ligand-gated ion channel activity	10/629	74/18352	0.000207241	0.0103028	0.00939597	22953/2895/55584/2890/2900/170572/1142/2903/5024/1135	10
MF	GO:0071723	lipopeptide binding	4/629	10/18352	0.000243384	0.011293	0.010299	909/910/3929/913	4
MF	GO:0099529	neurotransmitter receptor activity involved in regulation of postsynaptic membrane potential	8/629	50/18352	0.000274042	0.0118185	0.0107782	2895/153/55584/1128/2890/2900/1142/1135	8
MF	GO:0003777	microtubule motor activity	10/629	77/18352	0.00028867	0.0118185	0.0107782	1770/1769/83657/64446/221458/201625/56171/1768/9928/285643	10
MF	GO:0022843	voltage-gated cation channel activity	14/629	140/18352	0.000327311	0.0120225	0.0109643	3741/786/3760/51305/378807/3744/785/1268/3745/8913/3754/440699/2903/3739	14
MF	GO:0099094	ligand-gated cation channel activity	12/629	108/18352	0.000328201	0.0120225	0.0109643	22953/3760/55584/3744/2890/2900/170572/1142/2903/1259/5024/1135	12
MF	GO:0048018	receptor ligand activity	32/629	487/18352	0.000355885	0.0123848	0.0112947	2255/2660/7044/90226/1081/7432/407738/3623/5744/7060/2695/27189/51738/7031/6360/84666/116173/3558/51083/3641/8200/2277/8600/151449/6469/5179/1908/8190/344901/6358/4969/7425	32
MF	GO:0005244	voltage-gated ion channel activity	17/629	197/18352	0.000459115	0.0140785	0.0128393	3741/786/3760/51305/378807/3744/785/1268/3745/8913/3754/6323/6332/440699/2903/11280/3739	17
MF	GO:0022832	voltage-gated channel activity	17/629	197/18352	0.000459115	0.0140785	0.0128393	3741/786/3760/51305/378807/3744/785/1268/3745/8913/3754/6323/6332/440699/2903/11280/3739	17
MF	GO:0045505	dynein intermediate chain binding	6/629	30/18352	0.000465239	0.0140785	0.0128393	1770/1769/139212/83657/56171/1768	6
MF	GO:0042562	hormone binding	10/629	84/18352	0.000586546	0.0170098	0.0155126	90226/477/3061/1393/4161/2740/6344/3973/122042/9340	10
MF	GO:0003774	motor activity	13/629	132/18352	0.00061201	0.0170383	0.0155386	1770/1769/4620/83657/64446/27019/221458/84176/201625/56171/1768/9928/285643	13
MF	GO:0015081	sodium ion transmembrane transporter activity	14/629	152/18352	0.000751717	0.0201229	0.0183516	477/284525/159963/6554/6540/2900/6568/8913/6323/6332/6532/11280/200010/480	14
MF	GO:0030414	peptidase inhibitor activity	16/629	189/18352	0.000821267	0.0211704	0.019307	6318/643394/7429/5268/57119/221476/3933/5858/5273/12/1473/6691/27151/84651/5276/3053	16
MF	GO:0022824	transmitter-gated ion channel activity	8/629	60/18352	0.000967586	0.0216443	0.0197391	2895/55584/2890/2900/170572/1142/2903/1135	8
MF	GO:0022835	transmitter-gated channel activity	8/629	60/18352	0.000967586	0.0216443	0.0197391	2895/55584/2890/2900/170572/1142/2903/1135	8
MF	GO:0015079	potassium ion transmembrane transporter activity	14/629	156/18352	0.000970355	0.0216443	0.0197391	3741/477/53828/284525/3760/51305/3744/27345/2900/3745/3754/440699/480/3739	14
MF	GO:0015276	ligand-gated ion channel activity	13/629	139/18352	0.00099514	0.0216443	0.0197391	22953/2895/3760/55584/3744/2890/2900/170572/1142/2903/1259/5024/1135	13
MF	GO:0022834	ligand-gated channel activity	13/629	139/18352	0.00099514	0.0216443	0.0197391	22953/2895/3760/55584/3744/2890/2900/170572/1142/2903/1259/5024/1135	13
MF	GO:0004089	carbonate dehydratase activity	4/629	15/18352	0.00137965	0.029098	0.0265367	56934/761/759/766	4
MF	GO:0015077	monovalent inorganic cation transmembrane transporter activity	25/629	381/18352	0.00154791	0.0316866	0.0288975	3741/477/53828/284525/3760/159963/51305/6554/3744/6540/27345/2900/3745/6568/8913/3754/6323/6565/6332/440699/6532/11280/200010/480/3739	25
MF	GO:0004866	endopeptidase inhibitor activity	15/629	183/18352	0.00163002	0.032414	0.0295609	6318/643394/7429/5268/57119/3933/5858/5273/12/1473/6691/27151/84651/5276/3053	15
MF	GO:0008066	glutamate receptor activity	5/629	27/18352	0.00200854	0.0388317	0.0354137	2895/2890/2900/2913/2903	5
MF	GO:0061135	endopeptidase regulator activity	15/629	192/18352	0.00260246	0.0489545	0.0446454	6318/643394/7429/5268/57119/3933/5858/5273/12/1473/6691/27151/84651/5276/3053	15
